# Supplementary material for: Transmission dynamics of ESBL/AmpC and carbapenemase-producing Enterobacterales between companion animals and humans
Source: PubMed Central journal article supplement (PMC11405340; doi:10.3389/fmicb.2024.1432240), 2024-09-03
Supplement: Image_1.pdf [file Image_1.pdf]

65 companion animals and 102 humans living in close contact  
from two countries

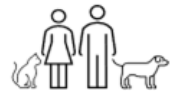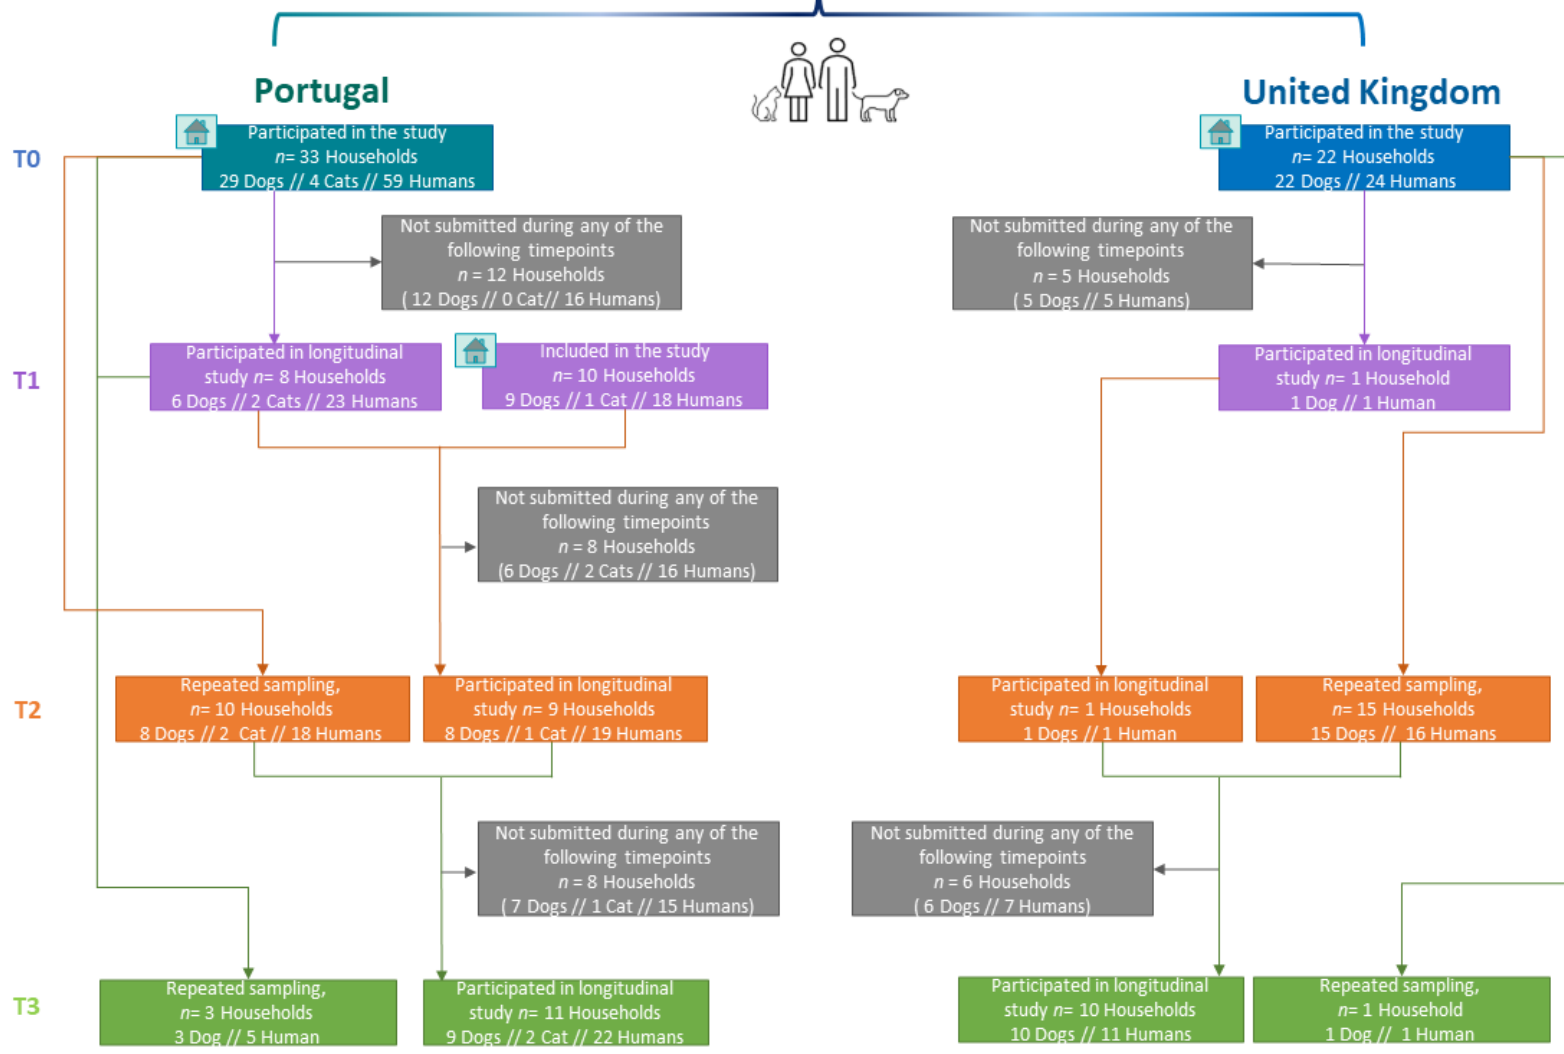

**Supplementary Figure S1.** Flow chart of households' participants by country. House symbol represents insertions of new households to the study. T0 concerns sampling before antimicrobial intake; T1 was done one week after antimicrobial treatment started; T2 one month after antimicrobial treatment started; T3 was achieved 2 months after antimicrobial treatment started; In total, 43 households from Portugal (covering 38 dogs, 5 cats and 78 humans) and 22 households the United Kingdom (covering 22 dogs, and 24 humans) were studied.
