# Supplementary material for: Transmission dynamics of ESBL/AmpC and carbapenemase-producing Enterobacterales between companion animals and humans
Source: PubMed Central journal article supplement (PMC11405340; doi:10.3389/fmicb.2024.1432240), 2024-09-03
Supplement: Image_2.pdf [file Image_2.pdf]

**Beta-lactamase encoding genes**

| Strain code      | Household member | Timepoint | Phylogroup | Beta-lactamase encoding genes  |                               |                              |                             |                               |
|------------------|------------------|-----------|------------|--------------------------------|-------------------------------|------------------------------|-----------------------------|-------------------------------|
|                  |                  |           |            | <i>bla</i> <sub>CTX-M</sub>    | <i>bla</i> <sub>TEM</sub>     | <i>bla</i> <sub>SHV</sub>    | <i>bla</i> <sub>CMY</sub>   | Carbapenemase                 |
| PT124/1-D1F3E1.1 | Dog D1           | T2        | B2         | -                              | -                             | -                            | <i>bla</i> <sub>CMY-2</sub> | -                             |
| PT124/2-D1F3E2   | Dog D1           | T2        | B2         | -                              | -                             | -                            | <i>bla</i> <sub>CMY-2</sub> | -                             |
| PT124/1-H1F3E1.1 | Human H1         | T2        | B2         | -                              | -                             | -                            | <i>bla</i> <sub>CMY-2</sub> | -                             |
| PT124/2-D1F3E4   | Dog D1           | T2        | B2         | -                              | -                             | -                            | <i>bla</i> <sub>CMY-2</sub> | -                             |
| PT121/2-D1F4E1   | Dog D1           | T2        | D          | -                              | -                             | -                            | <i>bla</i> <sub>CMY-2</sub> | -                             |
| PT121/2-D1F3E1   | Dog D1           | T2        | D          | -                              | -                             | -                            | <i>bla</i> <sub>CMY-2</sub> | -                             |
| PT102/1-H3F3E1   | Human H3         | T1        | B2         | <i>bla</i> <sub>CTX-M-1</sub>  | -                             | -                            | -                           | -                             |
| PT102/1-H3F3E2   | Human H3         | T1        | B2         | <i>bla</i> <sub>CTX-M-1</sub>  | -                             | -                            | -                           | -                             |
| PT102/2-H3F3E2   | Human H3         | T2        | B2         | <i>bla</i> <sub>CTX-M-1</sub>  | -                             | -                            | -                           | -                             |
| PT102/2-H3F3E3   | Human H3         | T2        | B2         | <i>bla</i> <sub>CTX-M-1</sub>  | -                             | -                            | -                           | -                             |
| PT102/1-H3F3E3   | Human H3         | T1        | B2         | <i>bla</i> <sub>CTX-M-1</sub>  | -                             | -                            | -                           | -                             |
| PT102/1-H3F3E4   | Human H3         | T1        | B2         | <i>bla</i> <sub>CTX-M-1</sub>  | -                             | -                            | -                           | -                             |
| PT127/1-H1F3E1   | Human H1         | T1        | B2         | <i>bla</i> <sub>CTX-M-32</sub> | <i>bla</i> <sub>TEM-1</sub>   | -                            | -                           | -                             |
| PT114/1-H1F3E2   | Human H1         | T2        | A          | <i>bla</i> <sub>CTX-M-32</sub> | -                             | -                            | <i>bla</i> <sub>CMY-2</sub> | -                             |
| PT114/1-H1F3E3   | Human H1         | T2        | A          | <i>bla</i> <sub>CTX-M-32</sub> | -                             | -                            | <i>bla</i> <sub>CMY-2</sub> | -                             |
| PT117/0-D1F3E1   | Dog D1           | T0        | B1         | -                              | -                             | <i>bla</i> <sub>SHV-12</sub> | -                           | -                             |
| PT114/0-H1F3E4   | Human H1         | T0        | A          | <i>bla</i> <sub>CTX-M-15</sub> | -                             | -                            | <i>bla</i> <sub>CMY-2</sub> | -                             |
| PT114/1-H1F3E1   | Human H1         | T2        | A          | <i>bla</i> <sub>CTX-M-32</sub> | -                             | -                            | -                           | -                             |
| PT102/2-H1F3E1   | Human H1         | T2        | A          | <i>bla</i> <sub>CTX-M-15</sub> | <i>bla</i> <sub>TEM-206</sub> | -                            | -                           | -                             |
| PT123/2-H1F3E1   | Human H1         | T3        | A          | <i>bla</i> <sub>CTX-M-32</sub> | -                             | -                            | -                           | -                             |
| PT121/2-H1F3E1   | Human H1         | T2        | D          | <i>bla</i> <sub>CTX-M-32</sub> | -                             | -                            | -                           | -                             |
| PT102/2-H3F3E1   | Human H3         | T2        | B2         | <i>bla</i> <sub>CTX-M-1</sub>  | -                             | -                            | -                           | -                             |
| PT101/0-H2F3E2   | Human H2         | T0        | A          | <i>bla</i> <sub>CTX-M-15</sub> | -                             | -                            | -                           | -                             |
| PT101/0-H2F3E4   | Human H2         | T0        | A          | <i>bla</i> <sub>CTX-M-15</sub> | -                             | -                            | -                           | -                             |
| PT101/2-D1F3E4   | Dog D1           | T2        | A          | <i>bla</i> <sub>CTX-M-15</sub> | -                             | -                            | -                           | -                             |
| PT101/2-H1F3E1   | Human H1         | T2        | A          | <i>bla</i> <sub>CTX-M-15</sub> | -                             | -                            | -                           | -                             |
| PT101/2-D1F3E2   | Dog D1           | T2        | A          | <i>bla</i> <sub>CTX-M-15</sub> | -                             | -                            | -                           | -                             |
| PT101/2-D1F3E5   | Dog D1           | T2        | A          | <i>bla</i> <sub>CTX-M-15</sub> | -                             | -                            | -                           | -                             |
| PT101/2-D1F3E3   | Dog D1           | T2        | A          | <i>bla</i> <sub>CTX-M-15</sub> | -                             | -                            | -                           | -                             |
| PT101/0-H1F3E2   | Human H1         | T0        | A          | <i>bla</i> <sub>CTX-M-15</sub> | -                             | -                            | -                           | -                             |
| PT101/0-H2F3E3   | Human H2         | T0        | A          | <i>bla</i> <sub>CTX-M-15</sub> | -                             | -                            | -                           | -                             |
| PT101/0-H2F3E1   | Human H2         | T0        | A          | <i>bla</i> <sub>CTX-M-15</sub> | -                             | -                            | -                           | -                             |
| PT101/3-H1F3E1   | Human H1         | T3        | A          | <i>bla</i> <sub>CTX-M-15</sub> | -                             | -                            | -                           | -                             |
| PT101/3-H1F3E2   | Human H1         | T3        | A          | <i>bla</i> <sub>CTX-M-15</sub> | -                             | -                            | -                           | -                             |
| PT101/3-H1F3E3   | Human H1         | T3        | A          | <i>bla</i> <sub>CTX-M-15</sub> | -                             | -                            | -                           | -                             |
| PT101/3-H1F3E4   | Human H1         | T3        | A          | <i>bla</i> <sub>CTX-M-15</sub> | -                             | -                            | -                           | -                             |
| PT101/3-D1F3E4   | Dog D1           | T3        | A          | <i>bla</i> <sub>CTX-M-15</sub> | -                             | -                            | -                           | -                             |
| PT101/2-H1F3E2   | Human H1         | T2        | A          | <i>bla</i> <sub>CTX-M-15</sub> | -                             | -                            | -                           | -                             |
| PT101/2-H1F3E3   | Human H1         | T2        | A          | <i>bla</i> <sub>CTX-M-15</sub> | -                             | -                            | -                           | -                             |
| PT101/2-H2F3E4   | Human H2         | T2        | A          | <i>bla</i> <sub>CTX-M-15</sub> | -                             | -                            | -                           | -                             |
| PT101/0-H1F3E1   | Human H1         | T0        | A          | <i>bla</i> <sub>CTX-M-15</sub> | -                             | -                            | -                           | -                             |
| PT101/2-D1F3E1   | Dog D1           | T2        | A          | <i>bla</i> <sub>CTX-M-15</sub> | -                             | -                            | -                           | -                             |
| PT101/2-H2F3E3   | Human H2         | T2        | A          | <i>bla</i> <sub>CTX-M-15</sub> | -                             | -                            | -                           | -                             |
| PT101/2-H2F3E1   | Human H2         | T2        | A          | <i>bla</i> <sub>CTX-M-15</sub> | -                             | -                            | -                           | -                             |
| PT101/3-D1F3E1   | Dog D1           | T3        | A          | <i>bla</i> <sub>CTX-M-15</sub> | -                             | -                            | -                           | -                             |
| PT101/3-D1F3E2   | Dog D1           | T3        | A          | <i>bla</i> <sub>CTX-M-15</sub> | -                             | -                            | -                           | -                             |
| PT101/3-D1F3E3   | Dog D1           | T3        | A          | <i>bla</i> <sub>CTX-M-15</sub> | -                             | -                            | -                           | -                             |
| PT101/2-H2F3E2   | Human H2         | T2        | A          | <i>bla</i> <sub>CTX-M-15</sub> | -                             | -                            | -                           | -                             |
| PT124/1-D1F3E1   | Dog D1           | T1        | B2         | <i>bla</i> <sub>CTX-M-55</sub> | -                             | -                            | -                           | -                             |
| PT124/1-D1F3E4   | Dog D1           | T1        | B2         | <i>bla</i> <sub>CTX-M-55</sub> | -                             | -                            | -                           | -                             |
| PT124/1-D1F3E6   | Dog D1           | T1        | B2         | <i>bla</i> <sub>CTX-M-55</sub> | -                             | -                            | -                           | -                             |
| PT124/1-D1F3E5   | Dog D1           | T1        | B2         | <i>bla</i> <sub>CTX-M-55</sub> | -                             | -                            | -                           | -                             |
| PT121/0-H1F3E1   | Human H1         | T1        | D          | <i>bla</i> <sub>CTX-M-32</sub> | -                             | -                            | -                           | -                             |
| PT123/0-D1F3E1   | Dog D1           | T0        | D          | <i>bla</i> <sub>CTX-M-55</sub> | <i>bla</i> <sub>TEM-135</sub> | -                            | -                           | -                             |
| PT114/0-H1F3E1   | Human H1         | T0        | A          | <i>bla</i> <sub>CTX-M-15</sub> | -                             | -                            | -                           | -                             |
| PT123/0-D1F4E1   | Dog D1           | T0        | D          | <i>bla</i> <sub>CTX-M-55</sub> | <i>bla</i> <sub>TEM-135</sub> | <i>bla</i> <sub>SHV-12</sub> | -                           | -                             |
| PT127/2-D1F3E1   | Dog D1           | T2        | B          | <i>bla</i> <sub>CTX-M-1</sub>  | -                             | -                            | -                           | -                             |
| PT127/1-D1F3E1   | Dog D1           | T2        | B          | <i>bla</i> <sub>CTX-M-1</sub>  | -                             | -                            | -                           | -                             |
| PT101/0-D1F3E4   | Dog D1           | T0        | B          | <i>bla</i> <sub>CTX-M-65</sub> | -                             | -                            | -                           | -                             |
| PT101/0-D1F3E3   | Dog D1           | T0        | B          | <i>bla</i> <sub>CTX-M-65</sub> | -                             | -                            | -                           | -                             |
| PT121/2-H3F3E1   | Human H3         | T2        | B          | <i>bla</i> <sub>CTX-M-34</sub> | <i>bla</i> <sub>TEM-1</sub>   | -                            | -                           | -                             |
| PT121/2-H2F3E1   | Human H2         | T2        | B          | <i>bla</i> <sub>CTX-M-34</sub> | <i>bla</i> <sub>TEM-1</sub>   | -                            | -                           | -                             |
| PT109            | Dog D1           | T2        | A          | <i>bla</i> <sub>CTX-M-15</sub> | -                             | -                            | -                           | <i>bla</i> <sub>OXA-181</sub> |
| PT101/2-D1F4E2   | Dog D1           | T2        | A          | <i>bla</i> <sub>CTX-M-15</sub> | -                             | -                            | -                           | <i>bla</i> <sub>OXA-181</sub> |
| PT101/2-D1F4E3   | Dog D1           | T2        | A          | <i>bla</i> <sub>CTX-M-15</sub> | -                             | -                            | -                           | <i>bla</i> <sub>OXA-181</sub> |
| PT101/2-D1F4E4   | Dog D1           | T2        | A          | <i>bla</i> <sub>CTX-M-15</sub> | -                             | -                            | -                           | <i>bla</i> <sub>OXA-181</sub> |
| PT101/0-D1F4E1   | Dog D1           | T0        | A          | <i>bla</i> <sub>CTX-M-15</sub> | -                             | -                            | -                           | <i>bla</i> <sub>OXA-181</sub> |
| PT113            | Dog D1           | T0        | A          | <i>bla</i> <sub>CTX-M-15</sub> | -                             | -                            | -                           | <i>bla</i> <sub>OXA-181</sub> |
| PT110/0-H1F3E1   | Human H1         | T0        | B          | <i>bla</i> <sub>CTX-M-65</sub> | <i>bla</i> <sub>TEM-1</sub>   | -                            | -                           | -                             |
| PT110/0-H1F3E2   | Human H1         | T0        | B          | <i>bla</i> <sub>CTX-M-65</sub> | <i>bla</i> <sub>TEM-1</sub>   | -                            | -                           | -                             |
| PT110/0-H1F3E3   | Human H1         | T0        | B          | <i>bla</i> <sub>CTX-M-65</sub> | <i>bla</i> <sub>TEM-1</sub>   | -                            | -                           | -                             |
| PT110/0-H1F3E4   | Human H1         | T0        | B          | <i>bla</i> <sub>CTX-M-65</sub> | <i>bla</i> <sub>TEM-1</sub>   | -                            | -                           | -                             |
| PT110/0-D1F3E1   | Dog D1           | T0        | B          | <i>bla</i> <sub>CTX-M-65</sub> | <i>bla</i> <sub>TEM-1</sub>   | -                            | -                           | -                             |
| PT110/0-D1F3E4   | Dog D1           | T0        | B          | <i>bla</i> <sub>CTX-M-65</sub> | <i>bla</i> <sub>TEM-1</sub>   | -                            | -                           | -                             |
| PT110/0-D1F3E2   | Dog D1           | T0        | B          | <i>bla</i> <sub>CTX-M-65</sub> | <i>bla</i> <sub>TEM-1</sub>   | -                            | -                           | -                             |
| PT110/0-D1F3E3   | Dog D1           | T0        | B          | <i>bla</i> <sub>CTX-M-65</sub> | <i>bla</i> <sub>TEM-1</sub>   | -                            | -                           | -                             |
| PT122/0-H1F3E2   | Human H1         | T0        | B          | <i>bla</i> <sub>CTX-M-15</sub> | <i>bla</i> <sub>TEM-135</sub> | -                            | -                           | -                             |
| PT122/0-H1F3E3   | Human H1         | T0        | B          | <i>bla</i> <sub>CTX-M-15</sub> | <i>bla</i> <sub>TEM-135</sub> | -                            | -                           | -                             |
| PT124/2-D1F3E5   | Dog D1           | T2        | B          | -                              | <i>bla</i> <sub>TEM-1</sub>   | -                            | <i>bla</i> <sub>CMY-2</sub> | -                             |
| PT124/2-D1F3E6   | Dog D1           | T2        | B          | -                              | <i>bla</i> <sub>TEM-1</sub>   | -                            | <i>bla</i> <sub>CMY-2</sub> | -                             |
| PT104/1-H2F3E1   | Human H2         | T2        | A          | <i>bla</i> <sub>CTX-M-32</sub> | -                             | -                            | -                           | -                             |
| PT114/0-H1F3E2   | Human H1         | T0        | A          | <i>bla</i> <sub>CTX-M-15</sub> | -                             | -                            | -                           | -                             |
| PT124/1-D1F3E7   | Dog D1           | T1        | B          | <i>bla</i> <sub>CTX-M-55</sub> | -                             | -                            | -                           | -                             |
| PT130/0-H2F3E3   | Human H2         | T0        | A          | <i>bla</i> <sub>CTX-M-15</sub> | <i>bla</i> <sub>TEM-1</sub>   | -                            | -                           | -                             |
| PT130/0-H2F3E1   | Human H2         | T0        | A          | <i>bla</i> <sub>CTX-M-15</sub> | <i>bla</i> <sub>TEM-1</sub>   | -                            | -                           | -                             |
| PT120/1-D1F3E1   | Dog D1           | T2        | B          | <i>bla</i> <sub>CTX-M-15</sub> | <i>bla</i> <sub>TEM-206</sub> | -                            | -                           | -                             |
| PT130/0-H2F3E2   | Human H2         | T0        | A          | <i>bla</i> <sub>CTX-M-15</sub> | <i>bla</i> <sub>TEM-1</sub>   | -                            | -                           | -                             |

**Supplementary Figure S2.** Dendrogram based on REP-PCR finger-printing data of 87 *Escherichia coli* carriage strains from companion animals with skin and soft tissue infection and their cohabiting humans from Portugal. Image generated by Bionumerics (Applied Maths, Sint-Martens-Latem, Belgium) software. The first five algorithms on the strains' identification represents the household code number. Blue star represents strains selected for WGS; orange stars identified OXA-181 producing strains from household PT101 previously described by our group (Brilhante *et al.*, 2020); '-', negative for the gene.
