# Supplementary material for: Transmission dynamics of ESBL/AmpC and carbapenemase-producing Enterobacterales between companion animals and humans
Source: PubMed Central journal article supplement (PMC11405340; doi:10.3389/fmicb.2024.1432240), 2024-09-03
Supplement: Image_3.pdf [file Image_3.pdf]

**Supplementary Figure S3.** Dendrogram based on REP-PCR finger-printing data of 88 *Escherichia coli* carriage strains from companion animals with urinary tract infection and their cohabiting humans from Portugal. Image generated by Bionumerics (Applied Maths, Sint-Martens-Latem, Belgium) software. The first five algorithms on the strains' identification represents the household code number. Blue star represents strains selected for WGS; '-', negative for the gene.
