# Supplementary material for: Transmission dynamics of ESBL/AmpC and carbapenemase-producing Enterobacterales between companion animals and humans
Source: PubMed Central journal article supplement (PMC11405340; doi:10.3389/fmicb.2024.1432240), 2024-09-03
Supplement: Image_4.pdf [file Image_4.pdf]

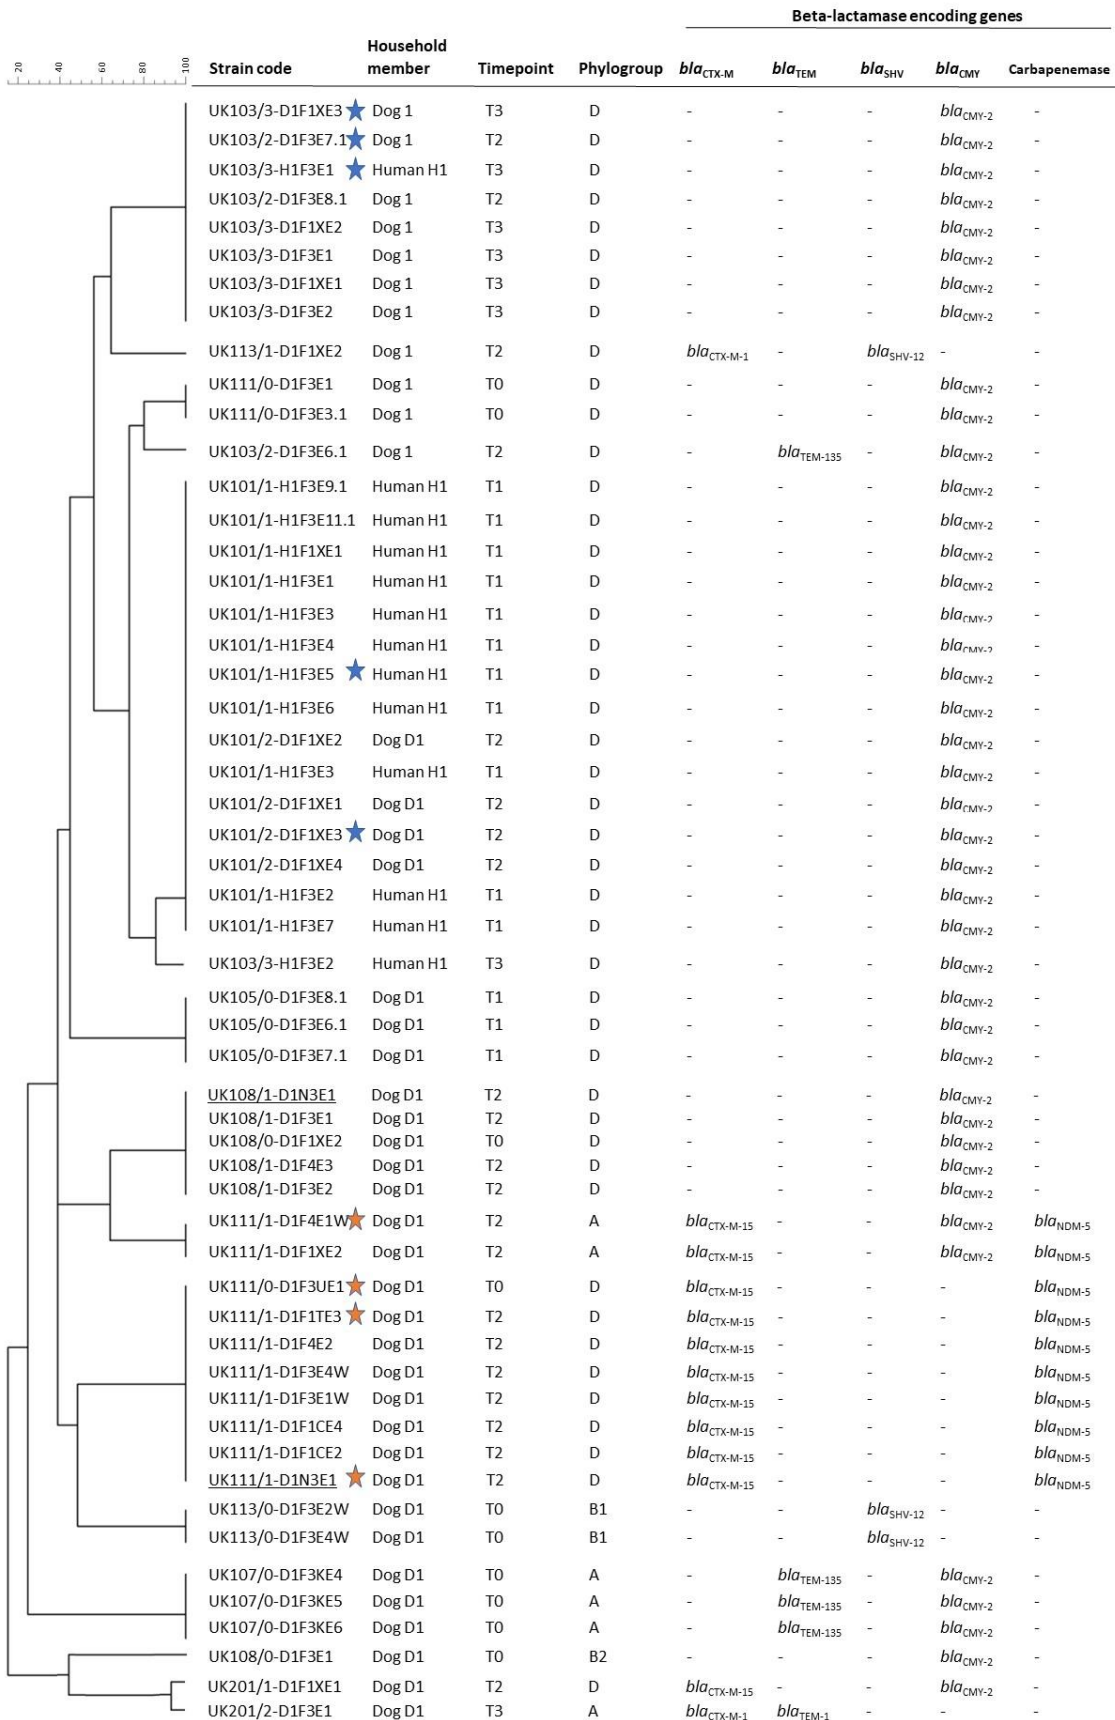

**Supplementary Figure S4.** Dendrogram based on REP-PCR finger-printing data of 54 *Escherichia coli* carriage strains from companion animals with skin and soft tissue or urinary tract infections and their cohabiting humans from the United Kingdom. Image generated by Bionumerics (Applied Maths, Sint-Martens-Latem, Belgium) software. The first five algorithms on the strains' identification represents the household code number. Blue star represents strains selected for WGS; orange stars identified NDM-5 producing strains from household PT111 previously described by our group (Menezes, S.-M. Frosini, *et al.*, 2023; underline strains code refers to nasal swab isolates, otherwise are faecal isolates; '-', negative for the gene.
